# Supplementary material for: XCL1 expression correlates with CD8-positive T cells infiltration and PD-L1 expression in squamous cell carcinoma arising from mature cystic teratoma of the ovary
Source: PubMed Central journal article supplement (PMC7176584; doi:10.1038/s41388-020-1237-0), 2020-03-02
Supplement: 41388_2020_1237_MOESM1_ESM.pdf [file 41388_2020_1237_MOESM1_ESM.pdf]

## **Supplementary Information**

**XCL1 expression correlates with CD8 positive T cells infiltration and PD-L1 expression in squamous cell carcinoma arising from mature cystic teratoma of the ovary**

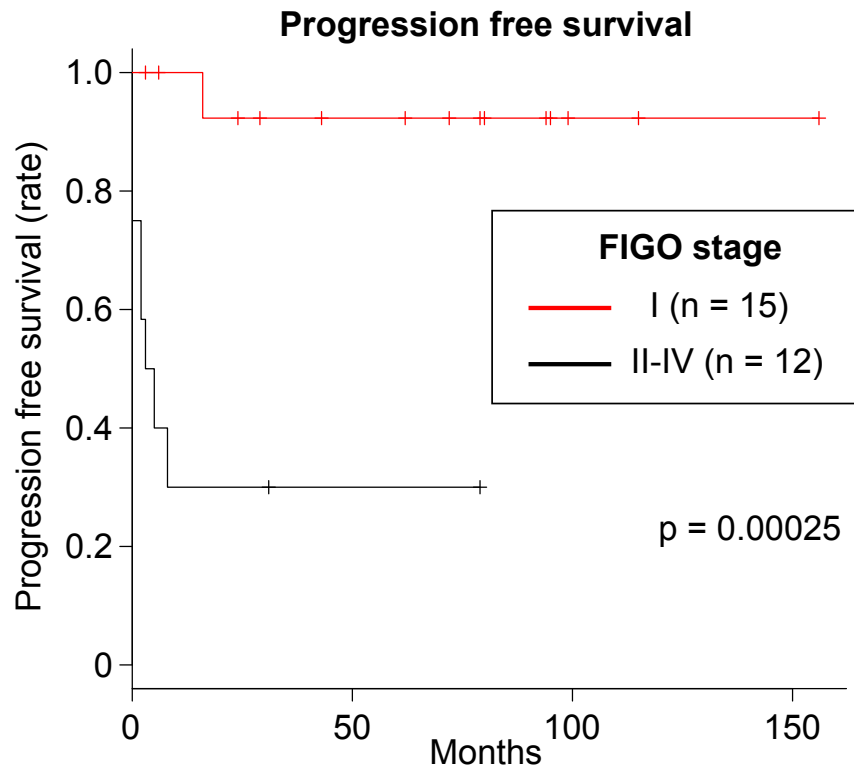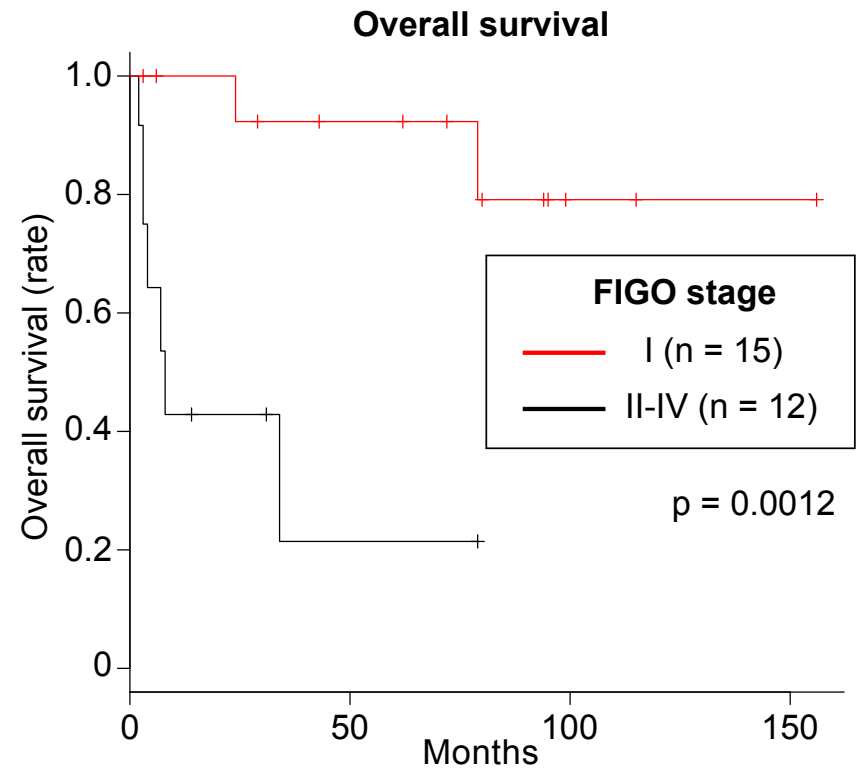

**Supplementary Figure 1. The prognostic value of clinical stage in 27 carcinomas arising from MCT** Kaplan-Meier estimates of progression-free survival and overall survival for stage I and stage II-IV patients.

**Skin epithelium adjacent to cancer site**  
7/27 (26%)

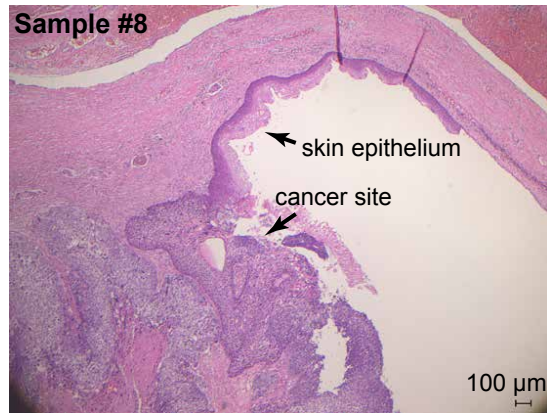

**NOS epithelium adjacent to cancer site**  
7/27 (26%)

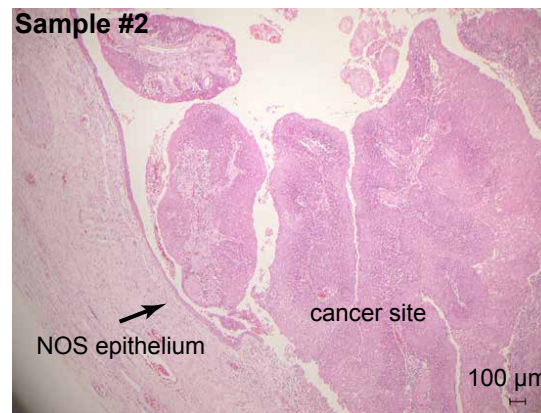

**Not available**  
13/27 (48%)

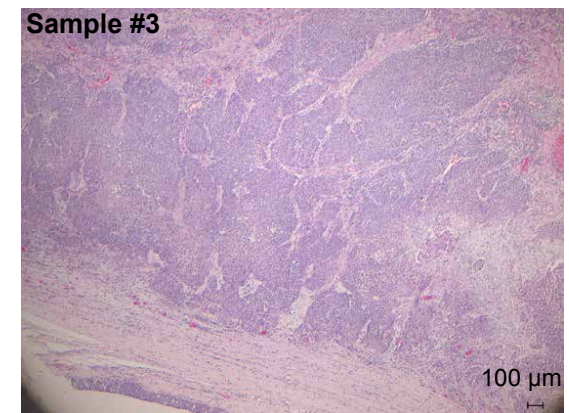

**Supplementary Figure 2. Histological findings of normal epithelium close to the cancer site in 27 patients of carcinoma arising from MCT**

Three types of representative images of H&E staining in 27 carcinomas arising from MCT are shown (100X magnification).

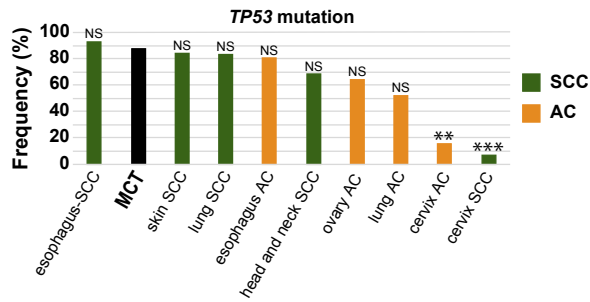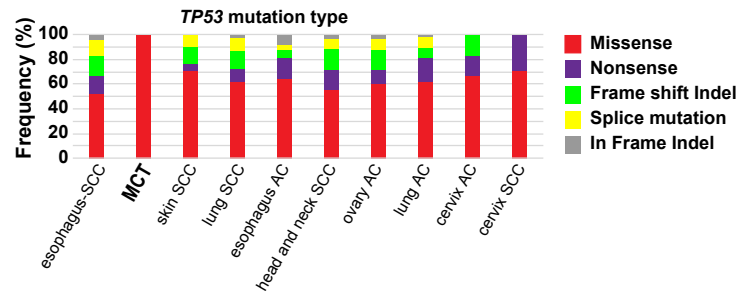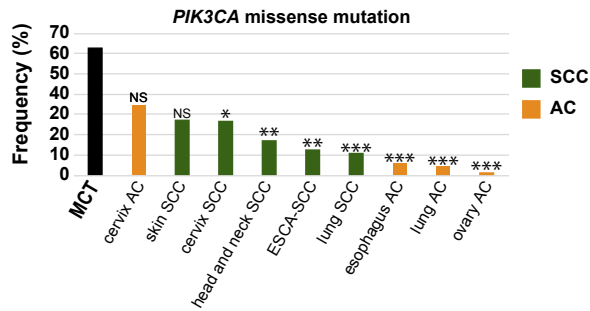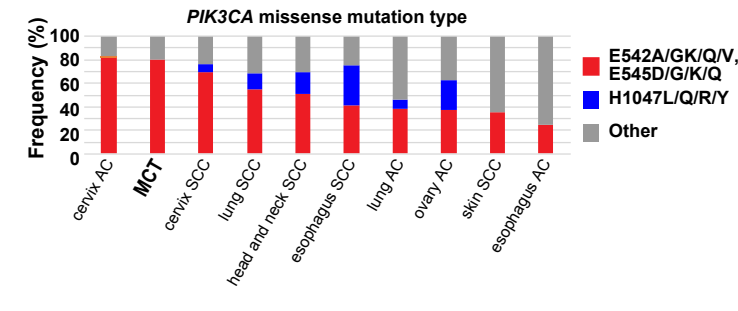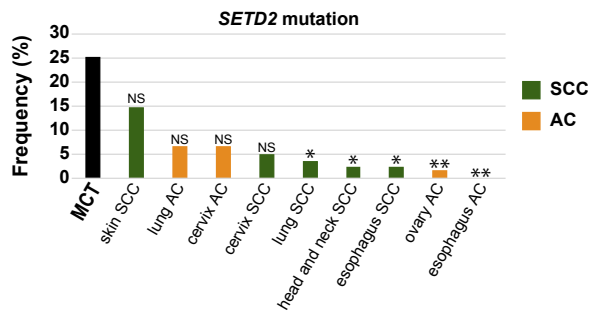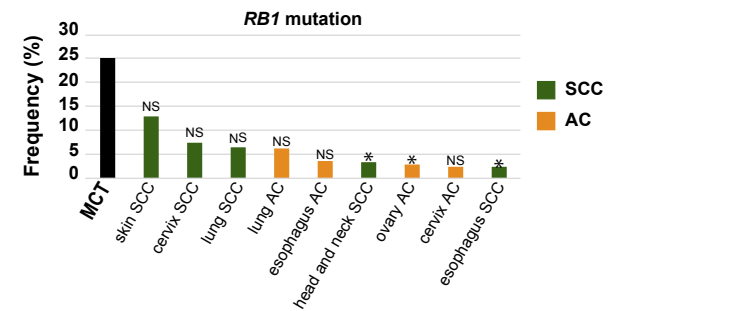

| Cancer type       | Number              |
|-------------------|---------------------|
| MCT               | 8 (7 SCC and 1 ASC) |
| skin SCC          | 55                  |
| head and neck SCC | 523                 |
| lung SCC          | 487                 |
| cervix SCC        | 251                 |
| esophagus SCC     | 95                  |
| ovary AC          | 585                 |
| lung AC           | 566                 |
| cervix AC         | 46                  |
| esophagus AC      | 87                  |

**Supplementary Figure 3. Comparison of the frequency of recurrent mutated genes (*TP53*, *PIK3CA*, *SETD2* and *RB1*) in MCT-SCCs with that in publicly available pan-cancer data**

Bar graphs show the frequency of mutations in each tumor type. Details of mutation types in *TP53* and *PIK3CA* are also shown. NS denotes Not Significant, \* denotes  $p < 0.05$ , \*\* denotes  $p < 0.01$  and \*\*\* denotes  $p < 0.001$ , respectively (MCT vs each cancer type).

## GO gene sets

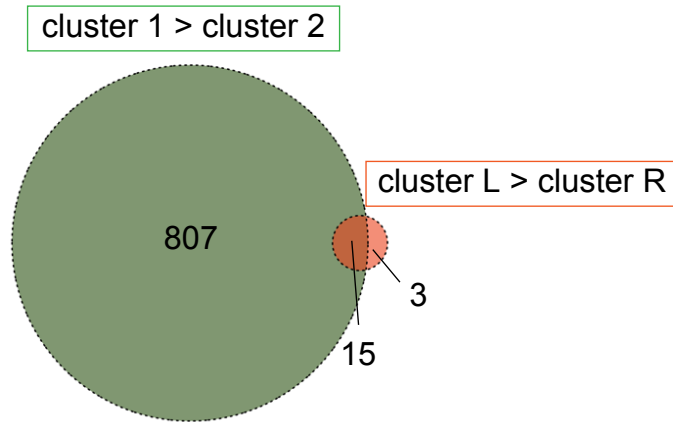

### Common enrichment pathway in cluster 1 and cluster L (GO terms)

- Epidermis development
- Keratinocyte differentiation
- Skin development
- Epidermal cell differentiation
- Intermediate filament based process
- Positive regulation of epidermis development
- Desmosome
- Intermediate filament organization
- Regulation of water loss via skin
- Cell substrate junction assembly
- Response to corticosterone
- Connexon complex
- Peptide cross linking
- Gap junction
- Keratinization

## HALLMARK gene sets

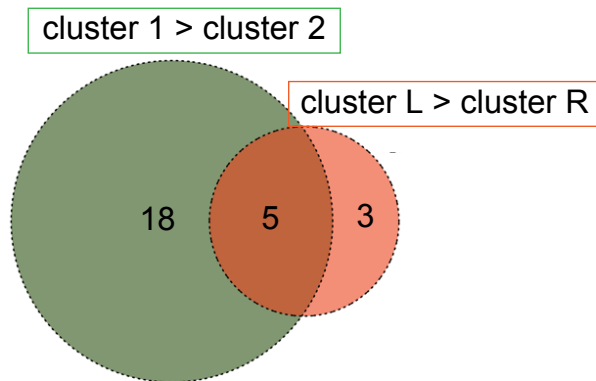

### Common enrichment pathway in cluster 1 and cluster L (HALLMARK terms)

- p53 pathway
- Estrogen response late
- Apical junction
- TNF $\alpha$  signaling via NFKB
- Estrogen response early

## Supplementary Figure 4. Common enrichment pathways between cluster 1 and cluster L

Venn diagrams show the number of common enrichment pathways in GO gene sets and HALLMARK gene sets between cluster 1 and cluster L.

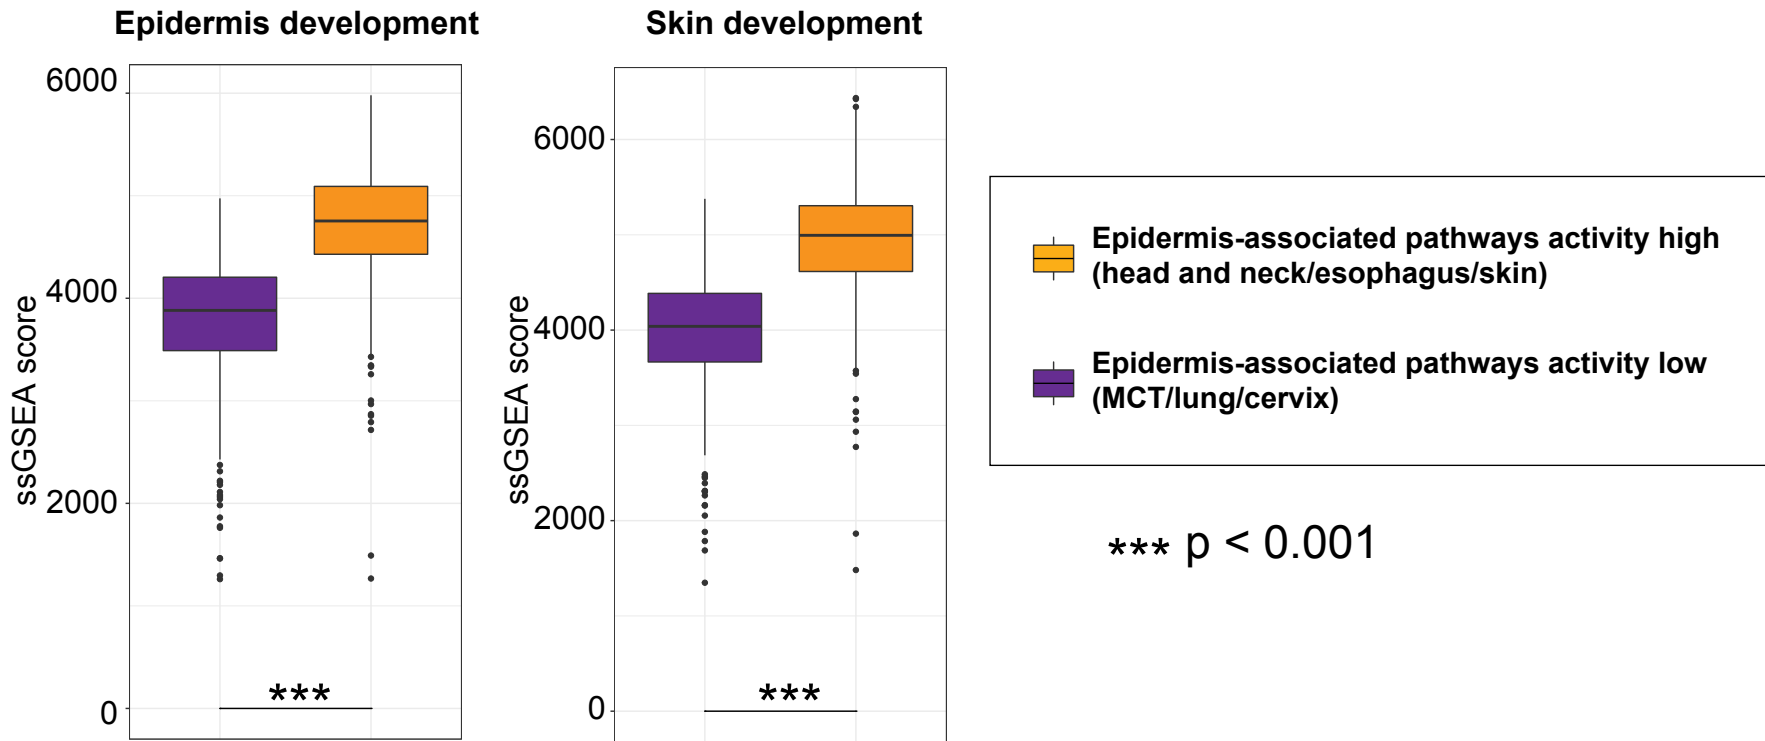

**Supplementary Figure 5. Comparison of two subgroups, high (head and neck, esophagus, and skin) and low (cervix, lung, and MCT) epidermis-associated pathways activity subgroups**

Boxplots show ssGSEA score of Epidermis development and Skin development in high (head and neck, esophagus and skin) and low (MCT, lung and cervix) epidermis-associated pathways activity subgroups. (\*\*\*) denotes  $p < 0.001$ .

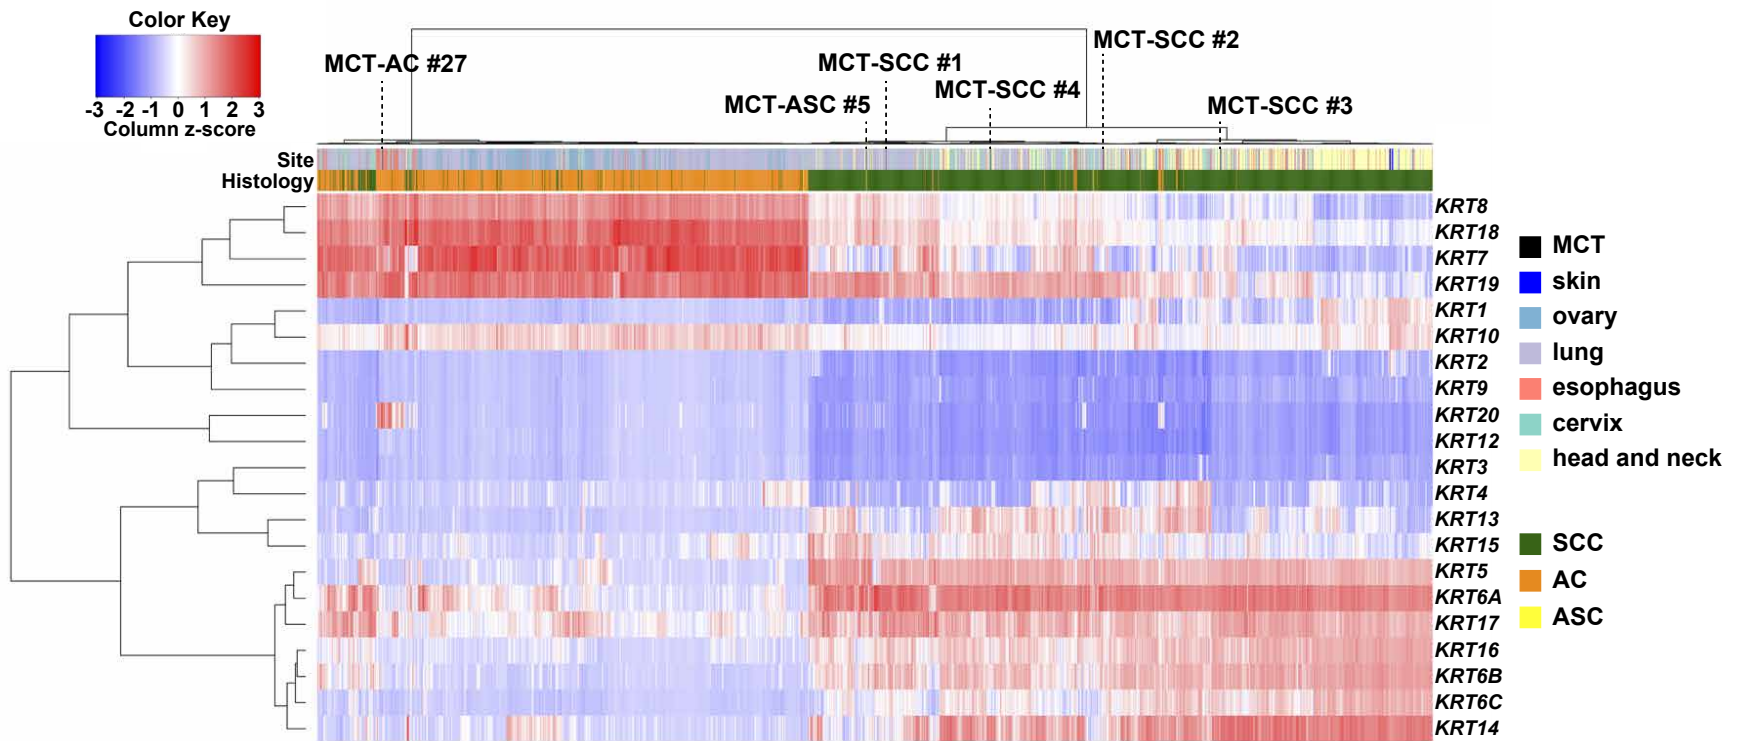

### Supplementary Figure 6. KRT gene expression in pan-SCCs and pan-ACs

A heatmap demonstrates the hierarchical clustering of the 21 KRT genes from 2,322 patients. The color bar and legend show the primary site and histology of the samples, respectively.

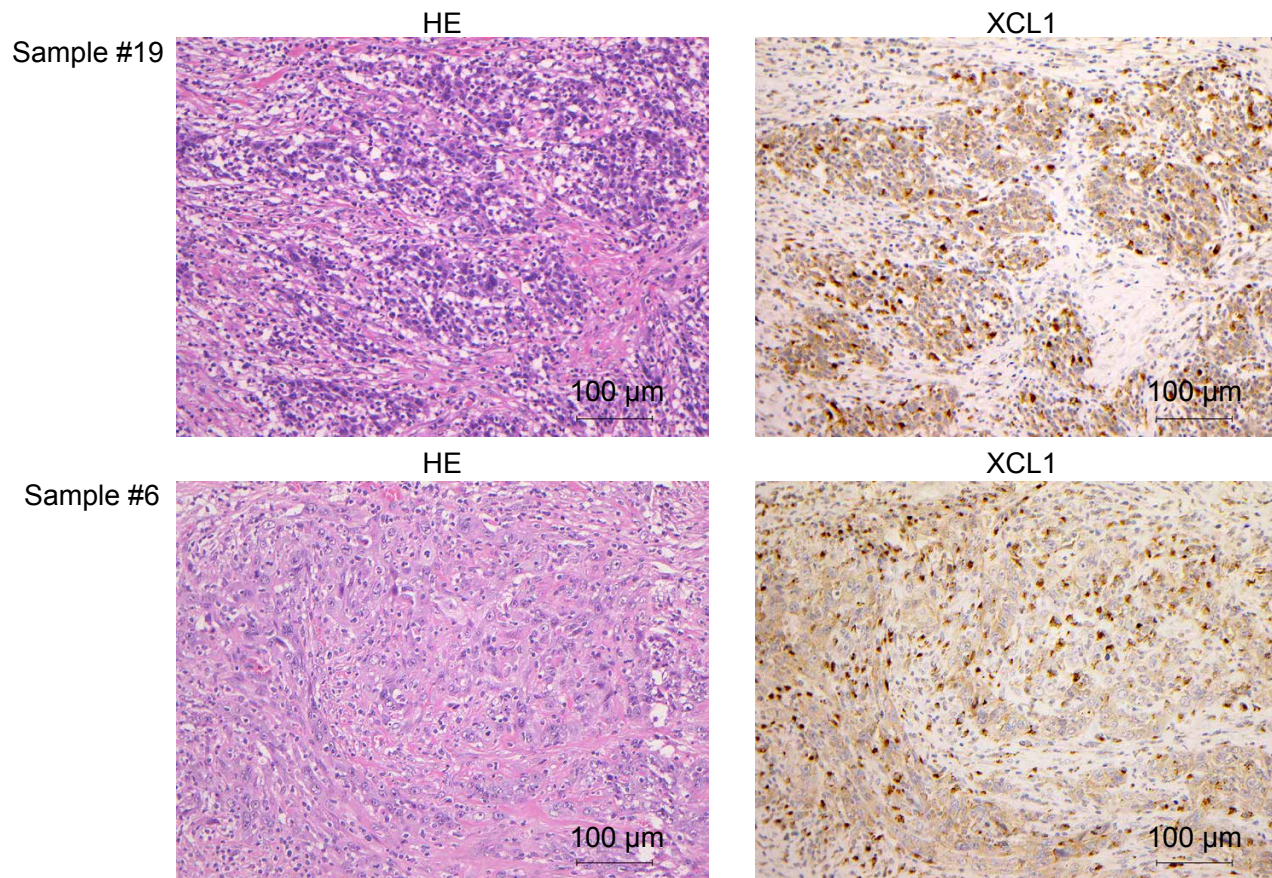

**Supplementary Figure 7. Histological findings of sample #19 and sample #6**

Representative images of H&E staining and immunohistochemical staining for XCL1 in samples #19 and #6 are shown (200X magnification). XCL1 staining was observed in both MCT-SCC cells and some intratumor immune cells (200X magnification).



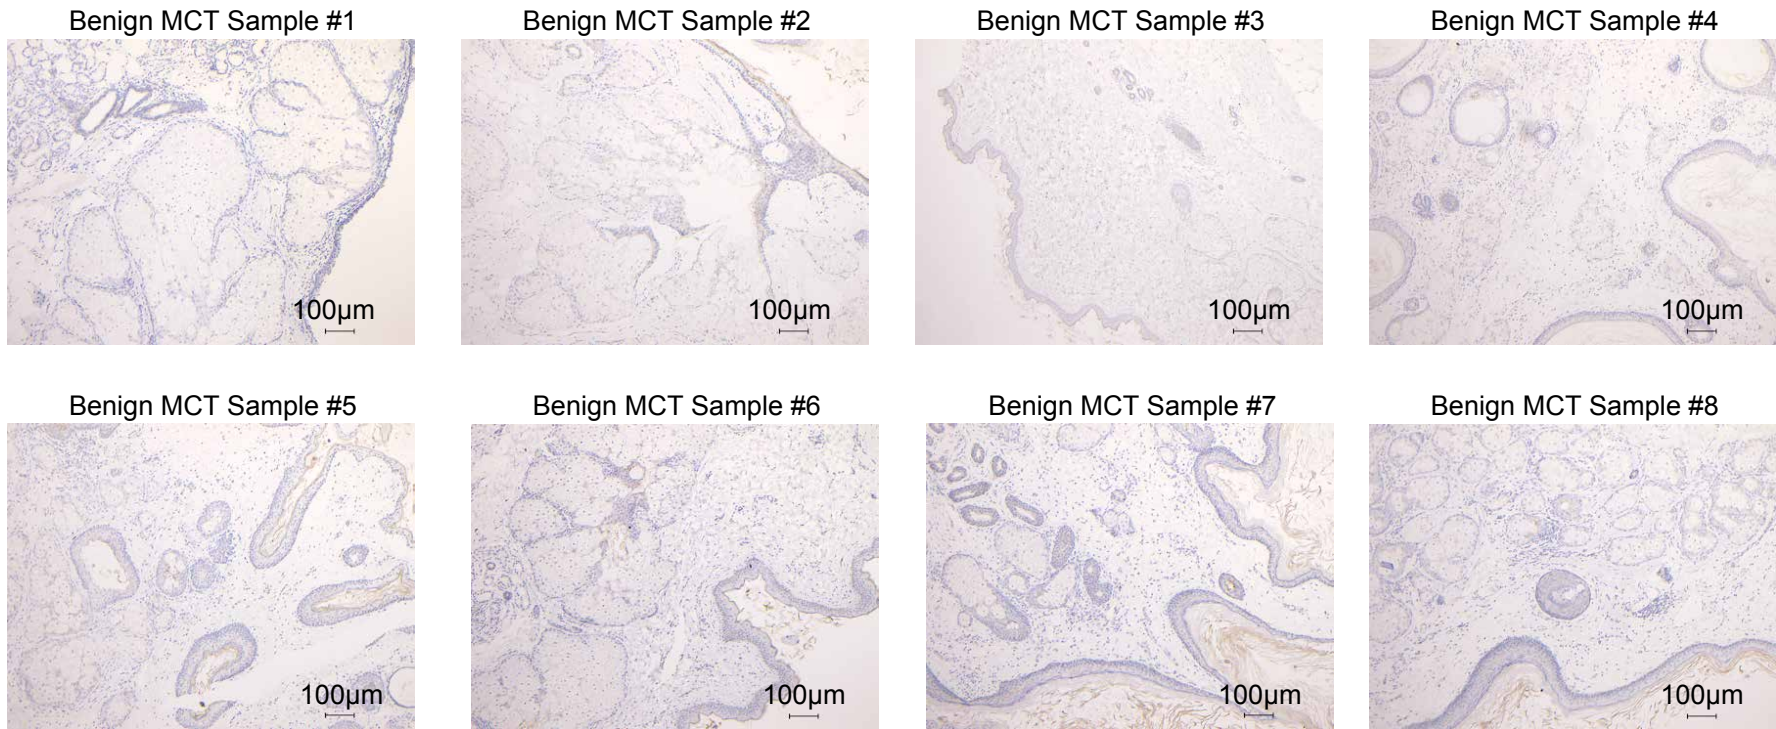

**Supplementary Figure 8. No expression of XCL1 in mature cystic teratoma of the ovary**  
Immunohistochemical staining for XCL1 in 8 benign MCTs (100X magnification).

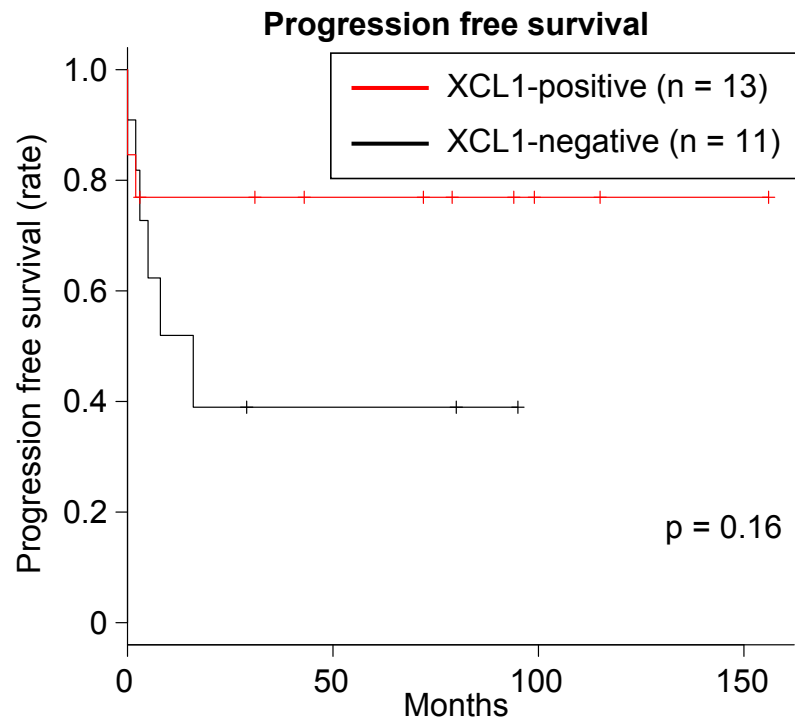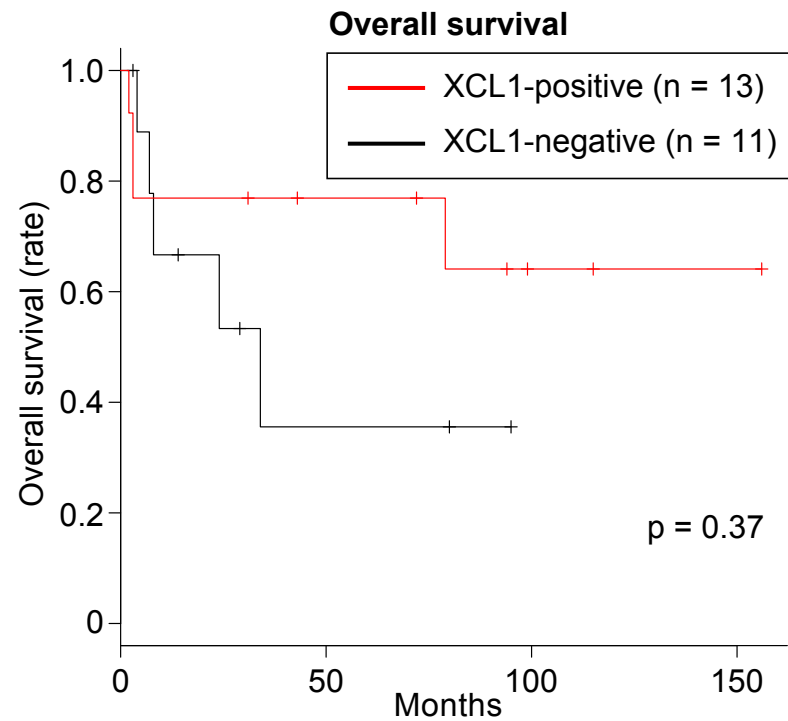

**Supplementary Figure 9. The prognostic value of XCL1 in 24 MCT-SCC/ASCs**

Kaplan-Meier estimates of progression-free survival and overall survival for XCL1-positive and XCL1-negative patients.

### pan-SCC

$r = 0.034, p = 0.21$

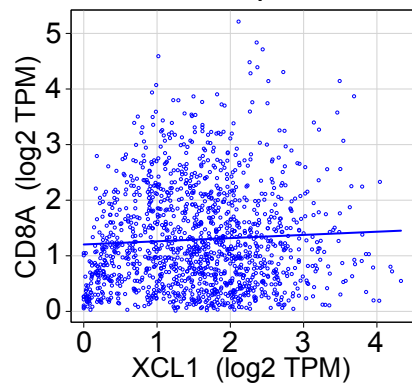

### head and neck SCC

$r = -0.045, p = 0.31$

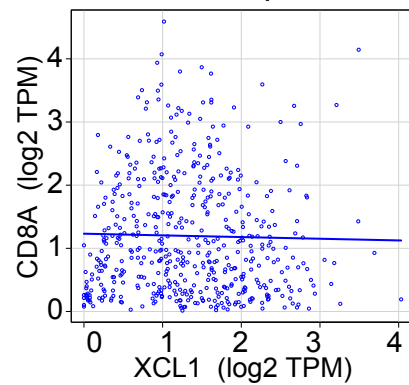

### lung SCC

$r = -0.047, p = 0.29$

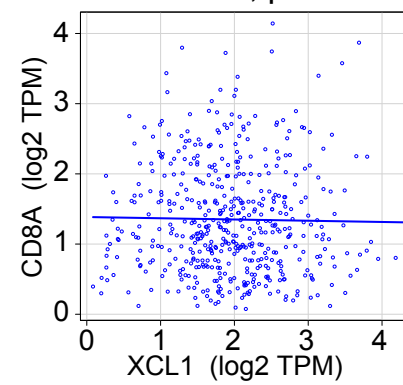

$r = -0.010, p = 0.71$

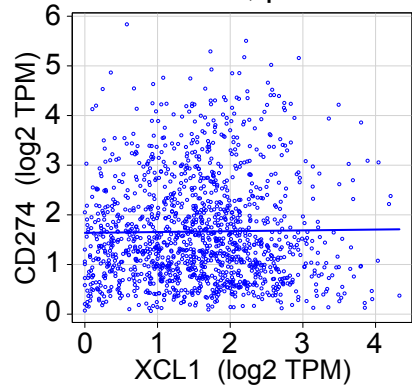

$r = -0.034, p = 0.44$

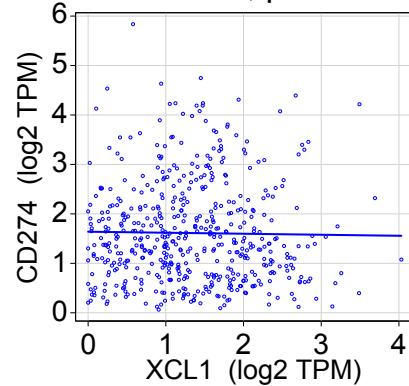

$r = -0.0636, p = 0.16$

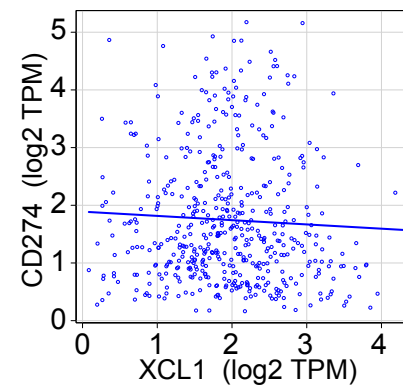

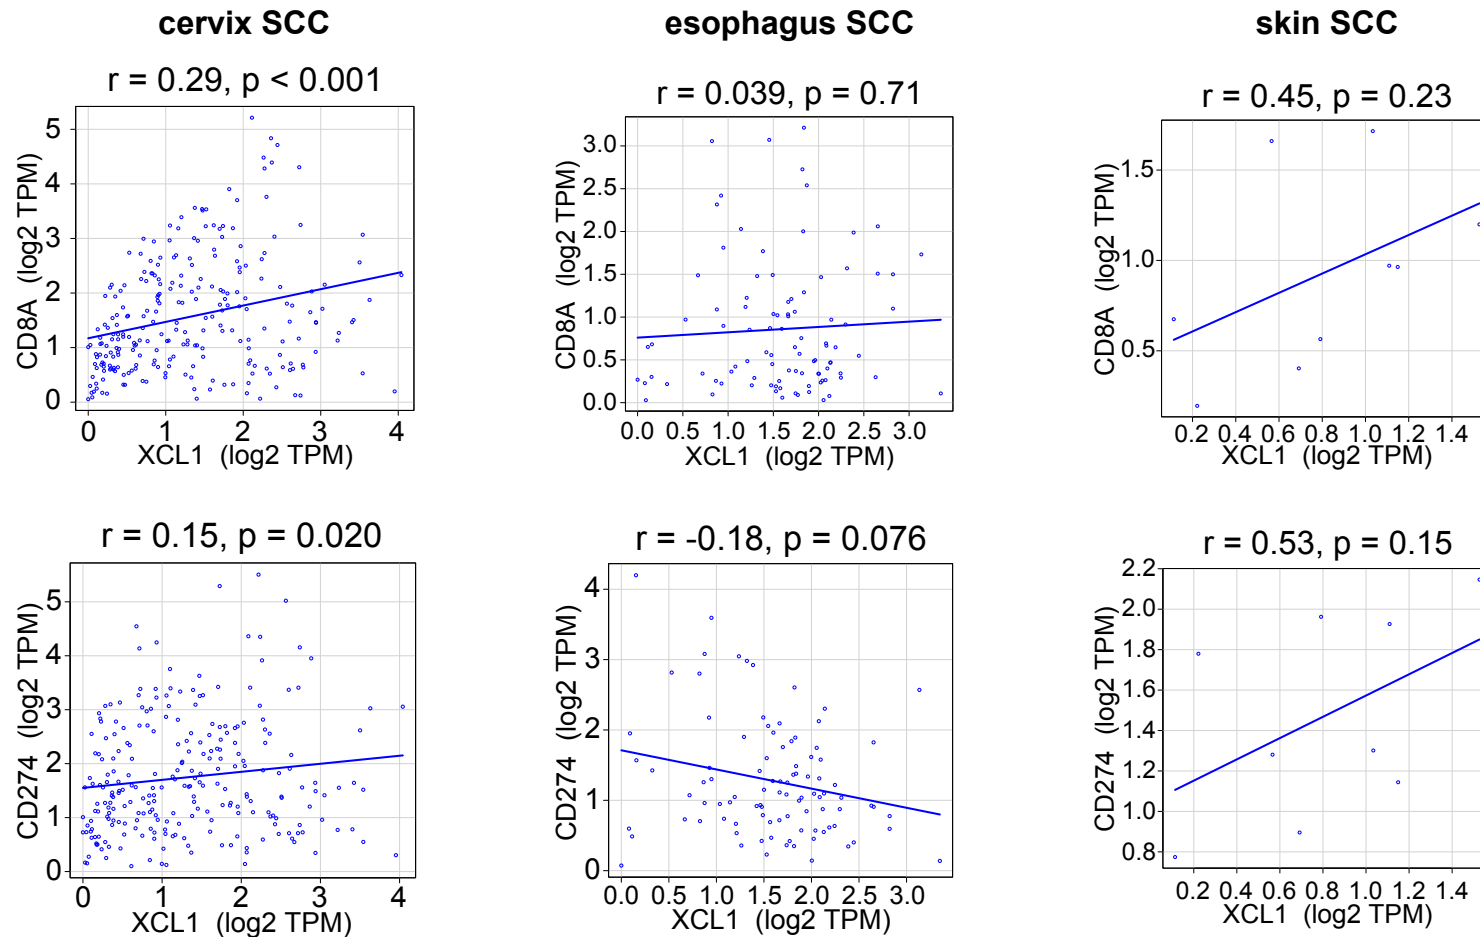

**Supplementary Figure 10. The association between *XCL1* expression and *CD8A/CD274* expression in SCCs.** The association between *XCL1* and *CD8A* (upper) or *CD274* (lower) mRNA expression in pan-SCCs and different SCCs is shown. Spearman rank correlation coefficient ( $r$ ) and  $p$ -value are calculated by using Spearman's rank test.

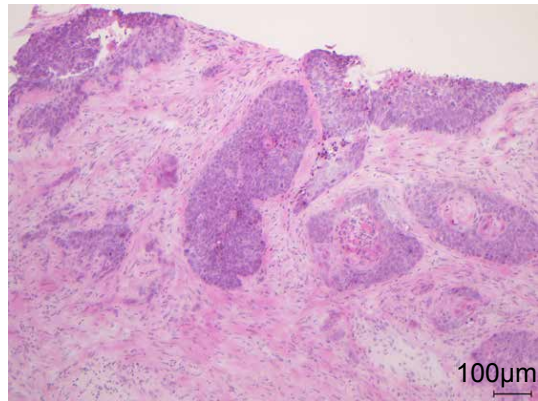

Sample #1

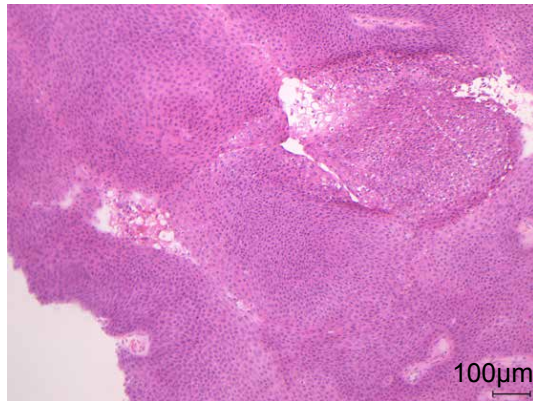

Sample #2

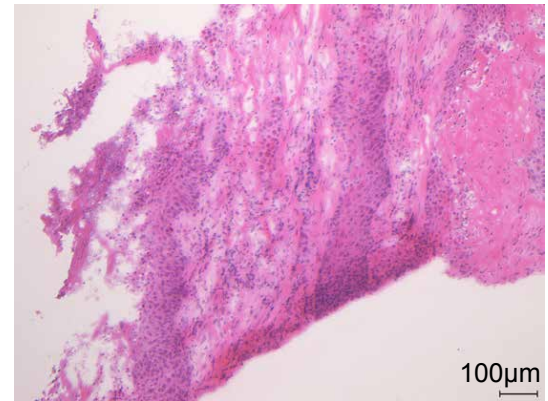

Sample #3

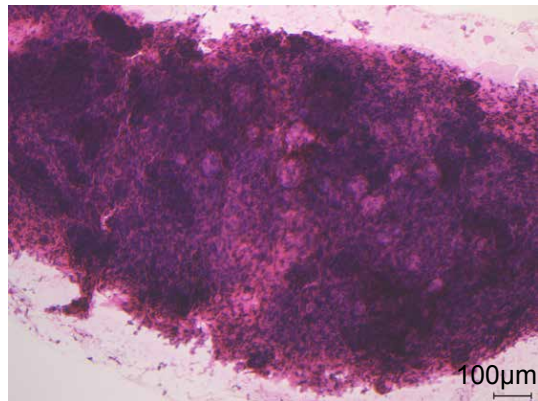

Sample #4

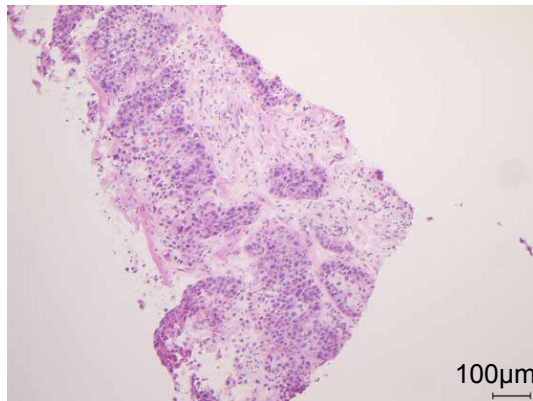

Sample #5

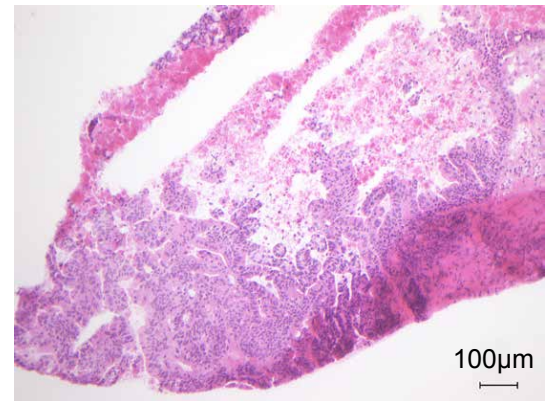

Sample #27

**Supplementary Figure 11. Histological assessment of the tumor cell content in 6 fresh-frozen samples**  
Representative images of H&E stained 6 fresh-frozen samples of carcinomas arising from mature cystic teratoma of the ovary (100X magnification.)

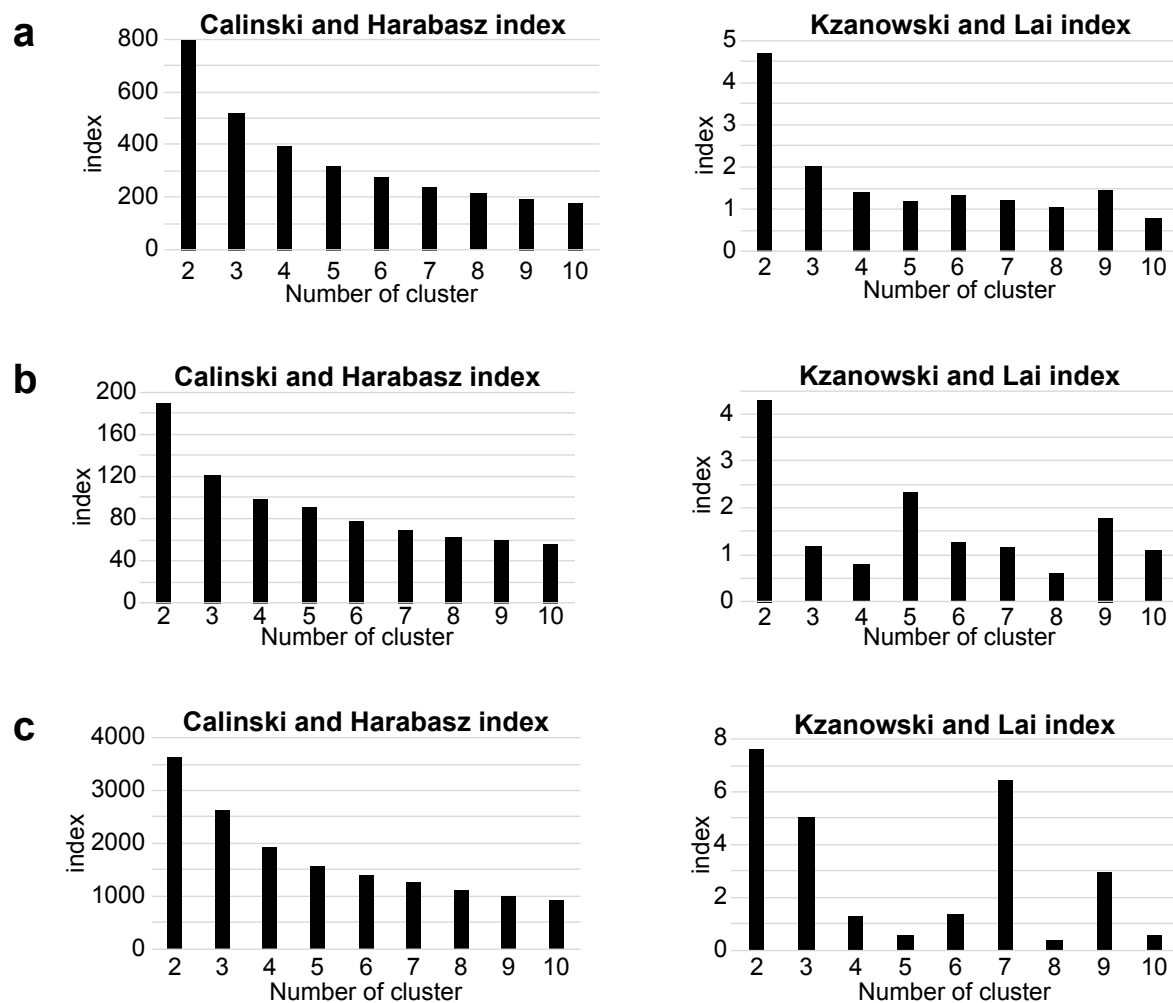

### Supplementary Figure 12. A validity of clustering methods

The bar graph shows the Calinski and Harabasz index and the Kzanowski and Lai index of A (Fig. 2a), B (Fig. 3a) and C (Supplementary Fig. 6), respectively.

| Gene          | Sample | Chr. | Position  | Amino acid substitution<br>(coding DNA substitution) | Exome sequencing                                                           | RNA sequencing |
|---------------|--------|------|-----------|------------------------------------------------------|----------------------------------------------------------------------------|----------------|
|               |        |      |           |                                                      | No. of reads containing mutation /<br>total reads at mutation position (%) |                |
| <i>TP53</i>   | #1     | 17   | 7578196   | V218G (T653G)                                        | 41/57 (72)                                                                 | 296/319 (93)   |
| <i>TP53</i>   | #3     | 17   | 7577085   | E285K (G853A)                                        | 31/74 (42)                                                                 | 69/89 (79)     |
| <i>TP53</i>   | #4     | 17   | 7578199   | V217E (T650A)                                        | 43/51 (84)                                                                 | 13/20 (65)     |
| <i>TP53</i>   | #5     | 17   | 7577568   | C238Y (G713G)                                        | 37/54 (69)                                                                 | 139/139 (100)  |
| <i>PIK3CA</i> | #1     | 3    | 178936989 | Y557C (A1670G)                                       | 7/131 (5)                                                                  | 0/74 (0)       |
| <i>PIK3CA</i> | #2     | 3    | 178936082 | E542K (G1624A)                                       | 13/27 (48)                                                                 | 27/46 (46)     |
| <i>PIK3CA</i> | #3     | 3    | 178936082 | E542K (G1624A)                                       | 14/29 (48)                                                                 | 43/69 (62)     |
| <i>PIK3CA</i> | #5     | 3    | 178936082 | E542K (G1624A)                                       | 6/61 (10)                                                                  | 17/42 (40)     |

**Supplementary Table 1. Validation of *TP53* and *PIK3CA* somatic mutations by RNA sequencing data**

| Gene             | Sample | Chr   | Position  | Accession number | Amino acid substitution<br>(coding DNA substitution) | Exome sequencing                                                           | RNA sequencing | OncoKB annotation   | COSMIC | FATHMM |
|------------------|--------|-------|-----------|------------------|------------------------------------------------------|----------------------------------------------------------------------------|----------------|---------------------|--------|--------|
|                  |        |       |           |                  |                                                      | No. of reads containing mutation /<br>total reads at mutation position (%) |                |                     |        |        |
| <i>TP53</i>      | #1     | chr17 | 7578196   | NM_000546        | V218G (T653G)                                        | 41/57 (72)                                                                 | 296/319 (93)   | likely oncogenic    | Yes    | 0.99   |
| <i>TP53</i>      | #3     | chr17 | 7577085   | NM_000546        | E285K (G853A)                                        | 31/74 (42)                                                                 | 69/89 (78)     | likely oncogenic    | Yes    | 0.99   |
| <i>TP53</i>      | #4     | chr17 | 7578199   | NM_000546        | V217E (T650A)                                        | 43/51 (84)                                                                 | 13/20 (65)     | likely oncogenic    | Yes    | 0.84   |
| <i>TP53</i>      | #5     | chr17 | 7577568   | NM_000546        | C238Y (G713A)                                        | 37/54 (69)                                                                 | 139/139 (100)  | likely oncogenic    | Yes    | 0.99   |
| <i>PIK3CA</i>    | #2     | chr3  | 178936082 | NM_006218        | E542K (G1624A)                                       | 13/27 (48)                                                                 | 27/46 (59)     | oncogenic           | Yes    | 0.98   |
| <i>PIK3CA</i>    | #3     | chr3  | 178936082 | NM_006218        | E542K (G1624A)                                       | 14/29 (48)                                                                 | 43/69 (62)     | oncogenic           | Yes    | 0.98   |
| <i>PIK3CA</i>    | #5     | chr3  | 178936082 | NM_006218        | E542K (G1624A)                                       | 6/61 (10)                                                                  | 17/42 (40)     | oncogenic           | Yes    | 0.98   |
| <i>SETD2</i>     | #1     | chr3  | 47098643  | NM_014159        | G2211X (G6631T)                                      | 65/74 (88)                                                                 | 23/31 (74)     | likely oncogenic    | NA     | 0.98   |
| <i>SETD2</i>     | #5     | chr3  | 47142964  | NM_014159        | Q1667X (C4999T)                                      | 17/52 (33)                                                                 | 15/34 (44)     | likely oncogenic    | Yes    | 0.98   |
| <i>KDM6A</i>     | #2     | chrX  | 44879855  | NM_001291418     | W148X (G444A)                                        | 18/58 (31)                                                                 | 18/63 (29)     | likely oncogenic    | NA     | 0.99   |
| <i>KMT2D</i>     | #3     | chr12 | 49432359  | NM_003482        | S2927X (C8780G)                                      | 23/119 (19)                                                                | 41/98 (42)     | likely oncogenic    | Yes    | 0.95   |
| <i>EP300</i>     | #3     | chr22 | 41521980  | NM_001429        | S281X (C842G)                                        | 34/107 (32)                                                                | 22/51 (43)     | likely oncogenic    | Yes    | 0.99   |
| <i>RB1</i>       | #1     | chr13 | 49030478  | NM_000321        | Y651fs (1954dupA)                                    | 96/119 (81)                                                                | 24/35 (69)     | likely oncogenic    | Yes    | NA     |
| <i>MYC</i>       | #5     | chr8  | 128750945 | NM_002467        | S161L (C482T)                                        | 190/372 (51)                                                               | 284/428 (66)   | predicted oncogenic | Yes    | 0.97   |
| <i>FBXW7</i>     | #3     | chr4  | 153247289 | NM_001013415     | R387G (C1159G)                                       | 66/143 (46)                                                                | 34/53 (64)     | likely oncogenic    | Yes    | 0.97   |
| <i>STK11</i>     | #5     | chr19 | 1220629   | NM_000455        | S216Y (C647A)                                        | 7/18 (39)                                                                  | 38/40 (95)     | likely oncogenic    | NA     | 0.96   |
| <i>RUNX1</i>     | #2     | chr21 | 36206728  | NM_001122607     | Q235X (C703T)                                        | 43/107 (40)                                                                | 12/76 (16)     | likely oncogenic    | Yes    | 0.95   |
| <i>MGA</i>       | #2     | chr15 | 41991137  | NM_001080541     | S697X (C2090G)                                       | 10/19 (53)                                                                 | 27/60 (45)     | likely oncogenic    | NA     | 0.97   |
| <i>MGA</i>       | #2     | chr15 | 42052559  | NM_001080541     | W2201X (G6603A)                                      | 33/79 (42)                                                                 | 58/102 (57)    | likely oncogenic    | NA     | 0.93   |
| <i>MGA</i>       | #2     | chr15 | 42052558  | NM_001080541     | W2201X (G6602A)                                      | 32/78 (41)                                                                 | 58/102 (57)    | likely oncogenic    | NA     | 0.93   |
| <i>FLT3</i>      | #3     | chr13 | 28597546  | NM_004119        | D787Y (G2359T)                                       | 26/37 (70)                                                                 | 2/2 (100)      | likely oncogenic    | NA     | 1.00   |
| <i>DNMT3B</i>    | #2     | chr20 | 31379488  | NM_175850        | R311X (C931T)                                        | 54/103 (52)                                                                | 8/9 (89)       | likely oncogenic    | Yes    | 0.94   |
| <i>ZFX3</i>      | #2     | chr16 | 72821959  | NM_006885        | G3406fs (10215dupC)                                  | 54/107 (50)                                                                | 2/16 (13)      | likely oncogenic    | Yes    | NA     |
| <i>CASP8</i>     | #2     | chr2  | 202131498 | NM_033358        | Q97X (C289T)                                         | 17/50 (34)                                                                 | 24/61 (39)     | likely oncogenic    | NA     | 0.99   |
| <i>ETV6</i>      | #3     | chr12 | 12037511  | NM_001987        | G381E (G1142A)                                       | 26/86 (30)                                                                 | 52/145 (36)    | predicted oncogenic | Yes    | 0.99   |
| <i>ALK</i>       | #1     | chr2  | 29519851  | NM_004304        | G574R (G1720A)                                       | 119/320 (37)                                                               | 0/0 (0)        | not annotated       | Yes    | 0.98   |
| <i>KLF5</i>      | #3     | chr13 | 73636032  | NM_001730        | Q99E (C295G)                                         | 8/81 (10)                                                                  | 0/408 (0)      | not annotated       | Yes    | 0.97   |
| <i>KEAP1</i>     | #3     | chr19 | 10600378  | NM_012289        | E493Q (G1477C)                                       | 13/60 (22)                                                                 | 168/373 (45)   | not annotated       | Yes    | 0.99   |
| <i>FGF3</i>      | #3     | chr11 | 69625228  | NM_005247        | E189K (G565A)                                        | 12/95 (13)                                                                 | 0/0 (0)        | not annotated       | Yes    | 0.99   |
| <i>RPS6KA4</i>   | #3     | chr11 | 64128609  | NM_001300802     | G156S (G466A)                                        | 46/58 (79)                                                                 | 136/142 (96)   | not annotated       | Yes    | 0.99   |
| <i>ERC1</i>      | #2     | chr12 | 1137275   | NM_001301248     | S69C (C206G)                                         | 65/151 (43)                                                                | 30/56 (54)     | not annotated       | Yes    | 0.99   |
| <i>GPHN</i>      | #5     | chr14 | 67390968  | NM_020806        | P263S (C787T)                                        | 63/246 (26)                                                                | 18/35 (51)     | not annotated       | Yes    | 0.99   |
| <i>HNRNPA2B1</i> | #4     | chr7  | 26236976  | NM_031243        | D87H (G259C)                                         | 31/130 (24)                                                                | 188/1229 (15)  | not annotated       | Yes    | 0.98   |
| <i>MLLT4</i>     | #2     | chr6  | 168352586 | NM_001207008     | L1494V (C4480G)                                      | 98/177 (55)                                                                | 71/145 (49)    | not annotated       | Yes    | 0.98   |
| <i>HIST1H1E</i>  | #5     | chr6  | 26156843  | NM_005321        | K75N (G225C)                                         | 23/57 (40)                                                                 | 11/11 (100)    | not annotated       | Yes    | 0.93   |

Chr = Chromosome, NA = Not Available

## Supplementary Table 2. Pathogenic gene mutations identified by using whole-exome sequencing in five MCT-SCCs



## Amplification

| Gene          | sample | copy number |
|---------------|--------|-------------|
| <i>AGO2</i>   | #4     | 8           |
| <i>MYC</i>    | #4     | 8           |
| <i>RICTOR</i> | #4     | 7           |
| <i>JUN</i>    | #4     | 6           |
| <i>TERT</i>   | #4     | 6           |
| <i>MET</i>    | #4     | 6           |
| <i>FGF19</i>  | #5     | 7           |
| <i>FGF4</i>   | #5     | 7           |
| <i>FGF3</i>   | #5     | 7           |

## Homozygous deletion

| Gene          | sample | copy number |
|---------------|--------|-------------|
| <i>CDKN2A</i> | #4     | 0           |
| <i>CDKN2B</i> | #4     | 0           |

**Supplementary Table 3. Copy number amplification and homozygous deletion identified by using whole-exome sequencing in five MCT-SCCs**

| Sample | 5' -Gene      | 3' -Gene          | Chromosome 5' -Gene | Chromosome 3' -Gene | Breakpoint position 5' -Gene | Breakpoint position 3' -Gene | PRADA Discordant read (n) | PRADA Junction spanning read (n) | FusionCather Spanning pairs (n) | FusionCatcher Spanning unique reads (n) |
|--------|---------------|-------------------|---------------------|---------------------|------------------------------|------------------------------|---------------------------|----------------------------------|---------------------------------|-----------------------------------------|
| #1     | <i>TRIP12</i> | <i>FN1</i>        | 2                   | 2                   | 230693909                    | 216253024                    | 48                        | 44                               | 50                              | 20                                      |
| #2     | <i>FGFR3</i>  | <i>TACC3</i>      | 4                   | 4                   | 1808661                      | 1741429                      | 81                        | 187                              | 302                             | 47                                      |
| #4     | <i>TNPO2</i>  | <i>GADD45GIP1</i> | 19                  | 19                  | 12825635                     | 13065340                     | 17                        | 16                               | 27                              | 14                                      |

**Supplementary Table 4. In-frame fusion transcripts identified in 5 MCT-SCCs by using both PRADA and FusionCatcher**

| Gene          | Sample | Chr   | Position  | Accession number | Coding DNA substitution | Amino acid substitution | Mutant Allele Frequency (MAF) |
|---------------|--------|-------|-----------|------------------|-------------------------|-------------------------|-------------------------------|
| <i>TP53</i>   | #6     | chr17 | 7576885   | NM_001126112     | 960delG                 | K321fs                  | 0.20                          |
| <i>TP53</i>   | #7     | chr17 | 7578382   | NM_001126112     | C548G                   | S183X                   | 0.42                          |
| <i>TP53</i>   | #8     | chr17 | 7578380   | NM_001126112     | G550C                   | D184H                   | 0.73                          |
| <i>TP53</i>   | #8     | chr17 | 7578513   | NM_001126112     | G417C                   | K139N                   | 0.71                          |
| <i>PIK3CA</i> | #6     | chr3  | 178936091 | NM_006218        | G1633A                  | E545K                   | 0.13                          |
| <i>TERT</i>   | #6     | chr5  | 1295250   | NM_198253        | C-146T promoter variant | NA                      | 0.11                          |
| <i>BRAF</i>   | #7     | chr7  | 140453155 | NM_004333        | G1780C                  | D594H                   | 0.38                          |
| <i>CDKN2A</i> | #7     | chr9  | 21971036  | NM_000077        | G322T                   | D108Y                   | 0.50                          |
| <i>AKT1</i>   | #7     | chr14 | 105246551 | NM_001014432     | G49A                    | E17K                    | 0.30                          |
| <i>CTNNB1</i> | #8     | chr3  | 41266113  | NM_001904        | C110G                   | S37C                    | 0.67                          |
| <i>RB1</i>    | #8     | chr13 | 48947575  | NM_000321        | 1166dupT                | L389fs                  | 0.81                          |
| <i>RAD51</i>  | #8     | chr15 | 41011016  | NM_001164269     | G452A                   | R151Q                   | 0.11                          |

| Gene          | Sample | Chr   | Copy number alteration |
|---------------|--------|-------|------------------------|
| <i>CDKN2A</i> | #7     | chr9  | loss                   |
| <i>CDKN2B</i> | #7     | chr9  | loss                   |
| <i>PTEN</i>   | #8     | chr10 | loss                   |
| <i>CDKN1B</i> | #8     | chr12 | loss                   |
| <i>SUFU</i>   | #8     | chr10 | loss                   |
| <i>SMAD4</i>  | #8     | chr18 | loss                   |

Chr = Chromosome, NA = Not Available

## Supplementary Table 5. Curated pathogenic alterations identified by using target sequencing in three MCT-SCCs

| Gene               | Oncogenic Alteration | Cancer type                                           | Drug                   | Highest level of evidence | Sample               |
|--------------------|----------------------|-------------------------------------------------------|------------------------|---------------------------|----------------------|
| <i>PIK3CA</i>      | E542K / E545K        | Breast Cancer                                         | PI3K inhibitor         | 1                         | #2<br>#3<br>#5<br>#6 |
| <i>FGFR3-TACC3</i> | <i>FGFR3</i> fusion  | Breast Cancer<br>All solid tumor                      | FGFR inhibitor         | 1                         | #2                   |
| <i>FLT3</i>        | D787Y (G2359T)       | Acute Myeloid Leukemia                                | Multi kinase inhibitor | 1                         | #3                   |
| <i>MET</i>         | Amplification        | Non-Small Cell Lung Cancer<br>Renal Cell Carcinoma    | Multi kinase inhibitor | 2                         | #4                   |
| <i>AKT1</i>        | E17K                 | Breast Cancer<br>Endometrial Cancer<br>Ovarian cancer | Akt inhibitor          | 3                         | #7                   |
| <i>BRAF</i>        | D594H                | Histiocytosis                                         | MEK inhibitor          | 3                         | #7                   |
| <i>CDKN2A</i>      | loss / D108Y         | All Solid Tumors                                      | CDK4/6 inhibitor       | 4                         | #7                   |
| <i>PTEN</i>        | loss                 | All Solid Tumors                                      | PI3K inhibitor         | 4                         | #8                   |
| <i>KDM6A</i>       | W148X (G444A)        | All Solid Tumors                                      | EZH2 inhibitor         | 4                         | #2                   |

**Supplementary Table 6. Details of druggable oncogenic alterations identified in 8 MCT-SCCs**

| <b>Sample</b> | <b>Sequencing platform</b> | <b>Tumor mutation burden (counts/Mb)</b> |
|---------------|----------------------------|------------------------------------------|
| #1            | Whole exome Sequencing     | 1.2                                      |
| #2            | Whole exome Sequencing     | 9.9                                      |
| #3            | Whole exome Sequencing     | 6.6                                      |
| #4            | Whole exome Sequencing     | 1.5                                      |
| #5            | Whole exome Sequencing     | 2.3                                      |
| #6            | Target Sequencing          | 0.8                                      |
| #7            | Target Sequencing          | 6.2                                      |
| #8            | Target Sequencing          | 7.7                                      |

**Supplementary Table 7. Tumor mutation burden in 8 MCT-SCCs**

|                           | <b>XCL1-positive<br/>(n = 13)</b> | <b>XCL1-negative<br/>(n = 11)</b> | <b>p-value</b> |
|---------------------------|-----------------------------------|-----------------------------------|----------------|
| <b>Median age (range)</b> | 59.5 (36-73)                      | 60 (33-79)                        | p = 0.44       |
| <b>stage</b>              |                                   |                                   |                |
| Early (stage I)           | 8                                 | 4                                 | p = 0.41       |
| Advanced (stage II-IV)    | 5                                 | 7                                 |                |
| <b>Histology</b>          |                                   |                                   |                |
| SCC                       | 11                                | 10                                | p = 1.00       |
| ASC                       | 2                                 | 1                                 |                |
| <b>Classification</b>     |                                   |                                   |                |
| keratinizing              | 4                                 | 9                                 | p = 0.019      |
| nonkeratinizing           | 9                                 | 2                                 |                |

**Supplementary Table 8. Comparison of clinicopathological findings between XCL1-positive and XCL1-negative patients**

| Survival                  | Characteristics                  | Multi-variate analysis |         |
|---------------------------|----------------------------------|------------------------|---------|
|                           |                                  | HR (95% CI)            | P-value |
| Progression free survival | CD8 high<br>(vs. low)            | 0.085<br>(0.0080-0.89) | 0.04    |
|                           | XCL1 positive<br>(vs. negative)  | 0.88<br>(0.0087-9.0)   | 0.92    |
|                           | PD-L1 positive<br>(vs. negative) | 3.4<br>(0.32-36)       | 0.31    |
| Overall survival          | CD8 high<br>(vs. low)            | 0.047<br>(0.0033-1.3)  | 0.038   |
|                           | XCL1 positive<br>(vs. negative)  | 2.2<br>(0.13-37)       | 0.58    |
|                           | PD-L1 positive<br>(vs. negative) | 3.1<br>(0.38-24)       | 0.29    |

**Supplementary Table 9. Multi-variate analysis by using XCL1, CD8 and PD-L1 expression in 24 MCT-SCC/ASCs**

| Target      | Forward primer       | Reverse primer            |
|-------------|----------------------|---------------------------|
| <i>XCL1</i> | AAGAGGACCTGTGTGAGCCT | GGCTTGTGGATCAGCACAGA      |
| <i>ACTB</i> | TGGCACCCAGCACAAATGAA | CTAAGTCATAGTCCGCCTAGAAGCA |

**Supplementary Table 10. Details of the primers used in this study**



**Supplementary Data 1. Significantly overrepresented pathways in cluster 1 compared with cluster 2 using GO gene sets and HALLMARK gene sets**

**Supplementary Data 2. Significantly overrepresented pathways in cluster L compared with cluster R using GO gene sets and HALLMARK gene sets**
